# Supplementary material
Source: Springer Nature journal article supplement (https://www.springermedizin.de/resource/supplementary/12885_2011_2974_MOESM4_ESM.pdf/9462394)

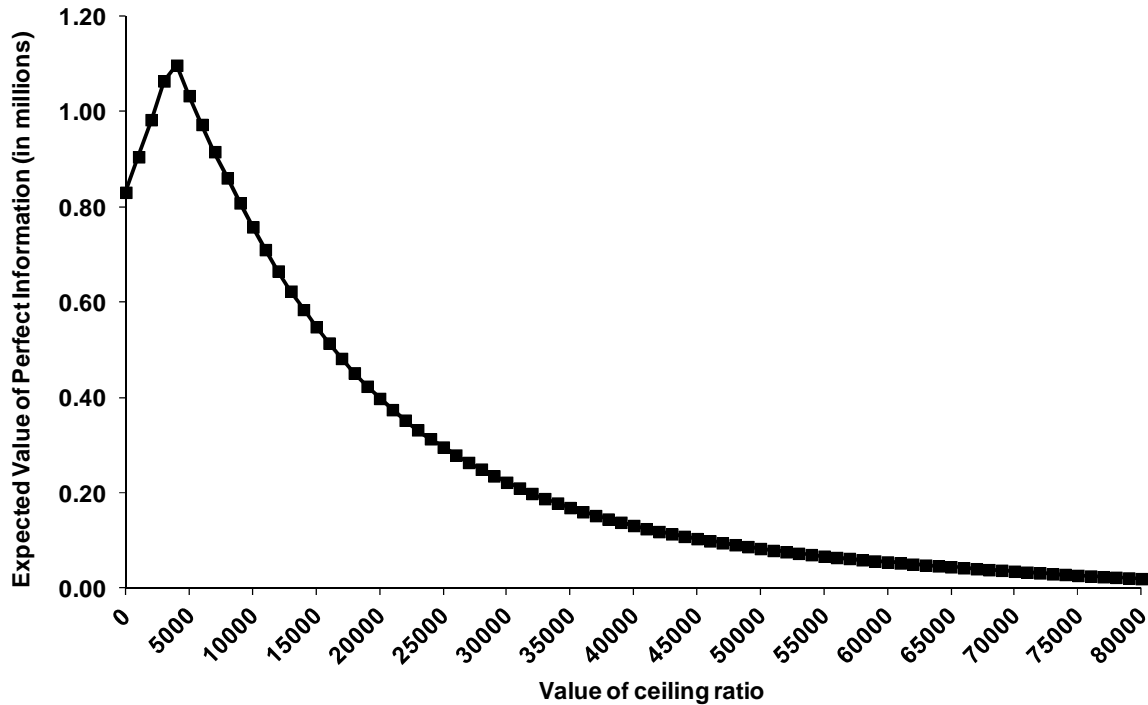

Supplement: MOESM4 [file 9462394]
